# Supplementary material for: Synthesis and Preliminary Screening of the Biological Activity of Sulindac Sulfoximine Derivatives
Source: MDPI journal article supplement (doi:10.3390/app132112002), 2023-11-03
Supplement: s1 [file s1]

## **Supplementary Materials**

### **Synthesis and preliminary screening of the biological activity of Sulindac sulfoximines derivatives.**

**Cosimo Cardellicchio<sup>1</sup>, Valentino Laquintana<sup>2</sup>, Rosa Maria Iacobazzi<sup>2</sup>, Nunzio Denora<sup>2</sup>, Antonio Scilimati<sup>2</sup>, Maria Grazia Perrone<sup>2</sup>, and Maria Annunziata M. Capozzi <sup>3\*</sup>**

## Table of Contents.

|                                                    |   |
|----------------------------------------------------|---|
| - <sup>1</sup> H- NMR Spectrum of compound 1b..... | 2 |
| - <sup>13</sup> C-NMR Spectrum of compound 1b..... | 3 |
| -HRMS (ESI-TOF) spectrum 1b.....                   | 4 |
| - <sup>1</sup> H- NMR Spectrum of compound 2b..... | 5 |
| - <sup>13</sup> C-NMR Spectrum of compound 2b..... | 6 |
| -HRMS (ESI-TOF) spectrum 2b.....                   | 7 |

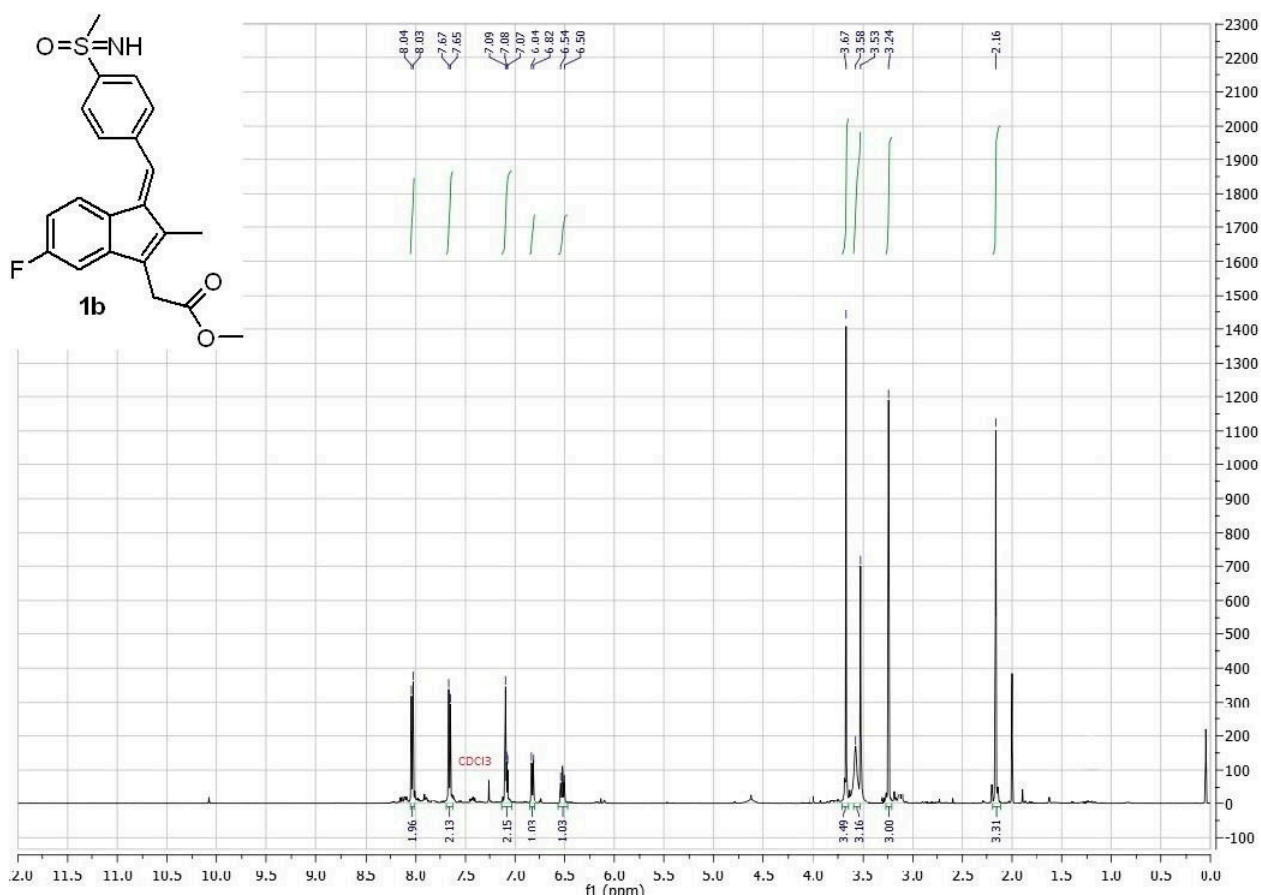

**Figure S1.** <sup>1</sup>H-NMR (500 MHz, CDCl<sub>3</sub>) spectrum of **Methyl-(Z)-2-(5-fluoro-2-methyl-1-(4-(Smethylsulfonimidoyl)benzylidene)-1H-inden-3-yl)acetate (1b)**.

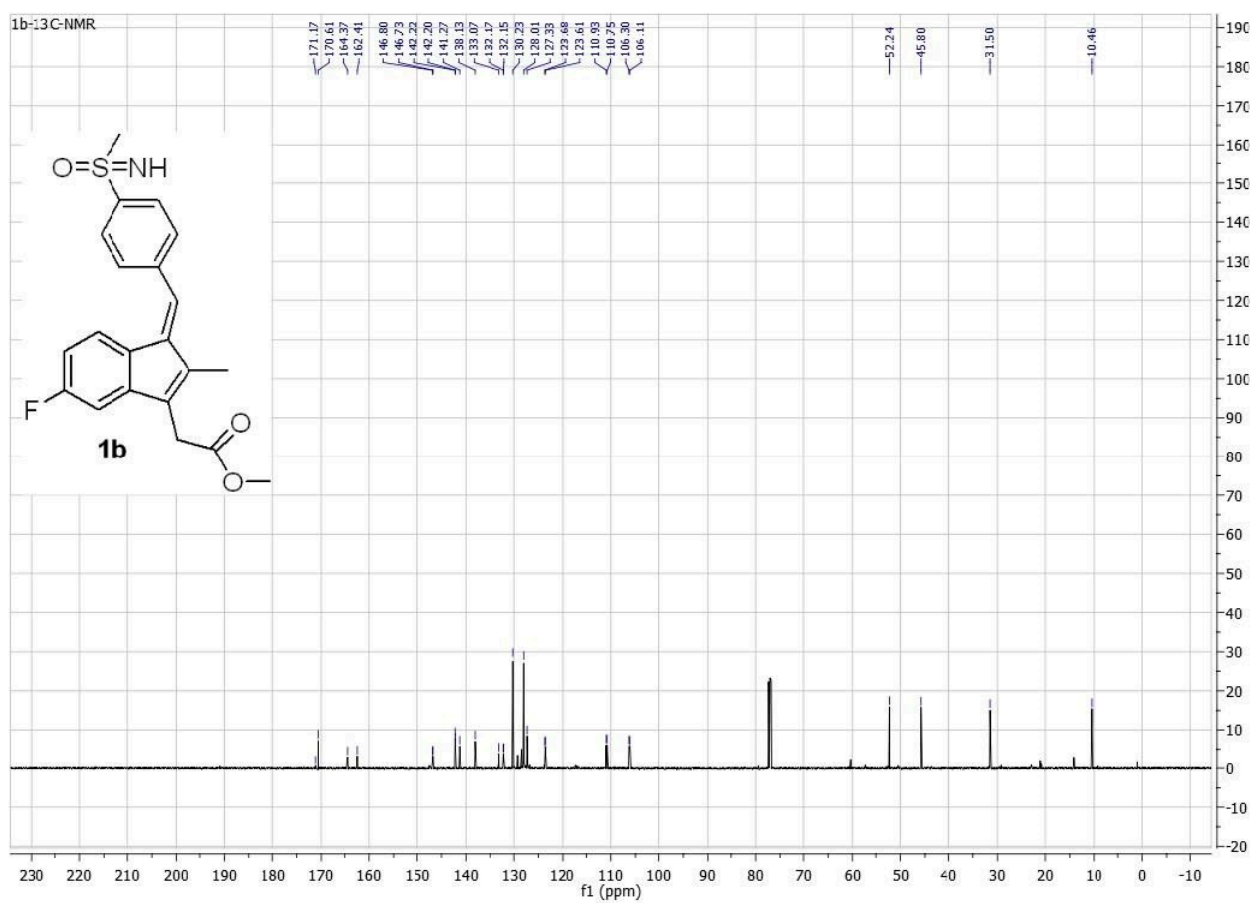

**Figure S2.** <sup>13</sup>C-NMR (125 MHz, CDCl<sub>3</sub>) spectrum of **Methyl-(Z)-2-(5-fluoro-2-methyl-1-(4-(methanesulfonylamino)benzylidene)-1H-inden-3-yl)acetate (1b)**.

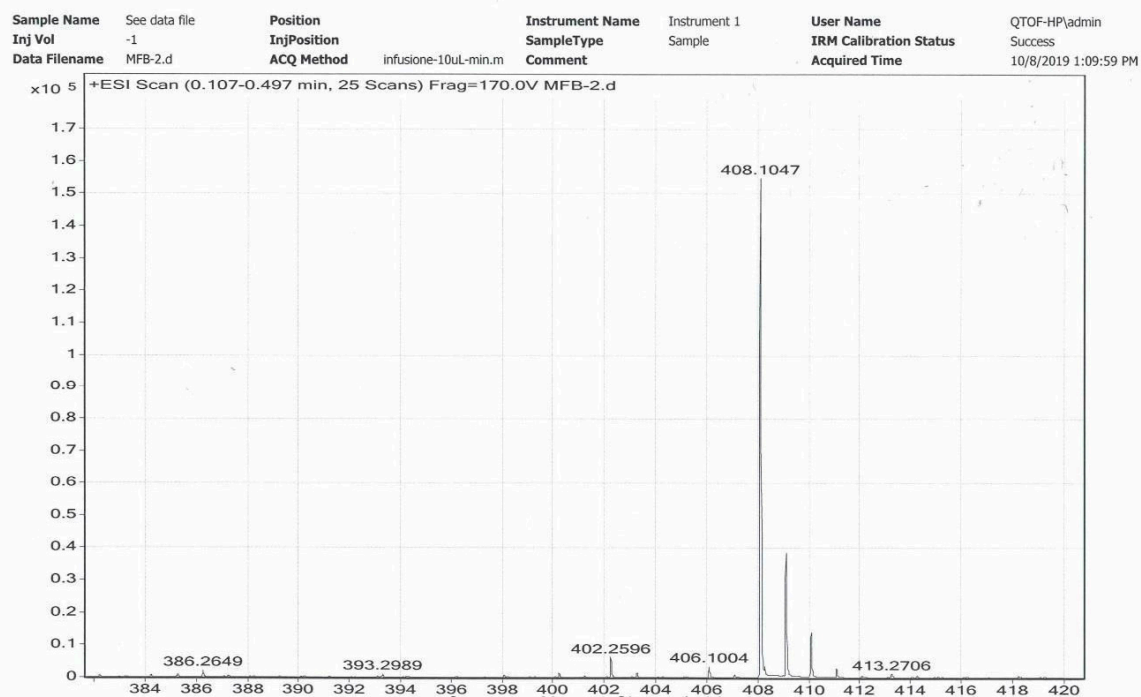

**Figure S3.** HRMS (ESI-TOF) spectrum of **Methyl-(Z)-2-(5-fluoro-2-methyl-1-(4-(S-methylsulfonimidoyl)benzylidene)-1Hinden-3-yl)acetate(1b)**.

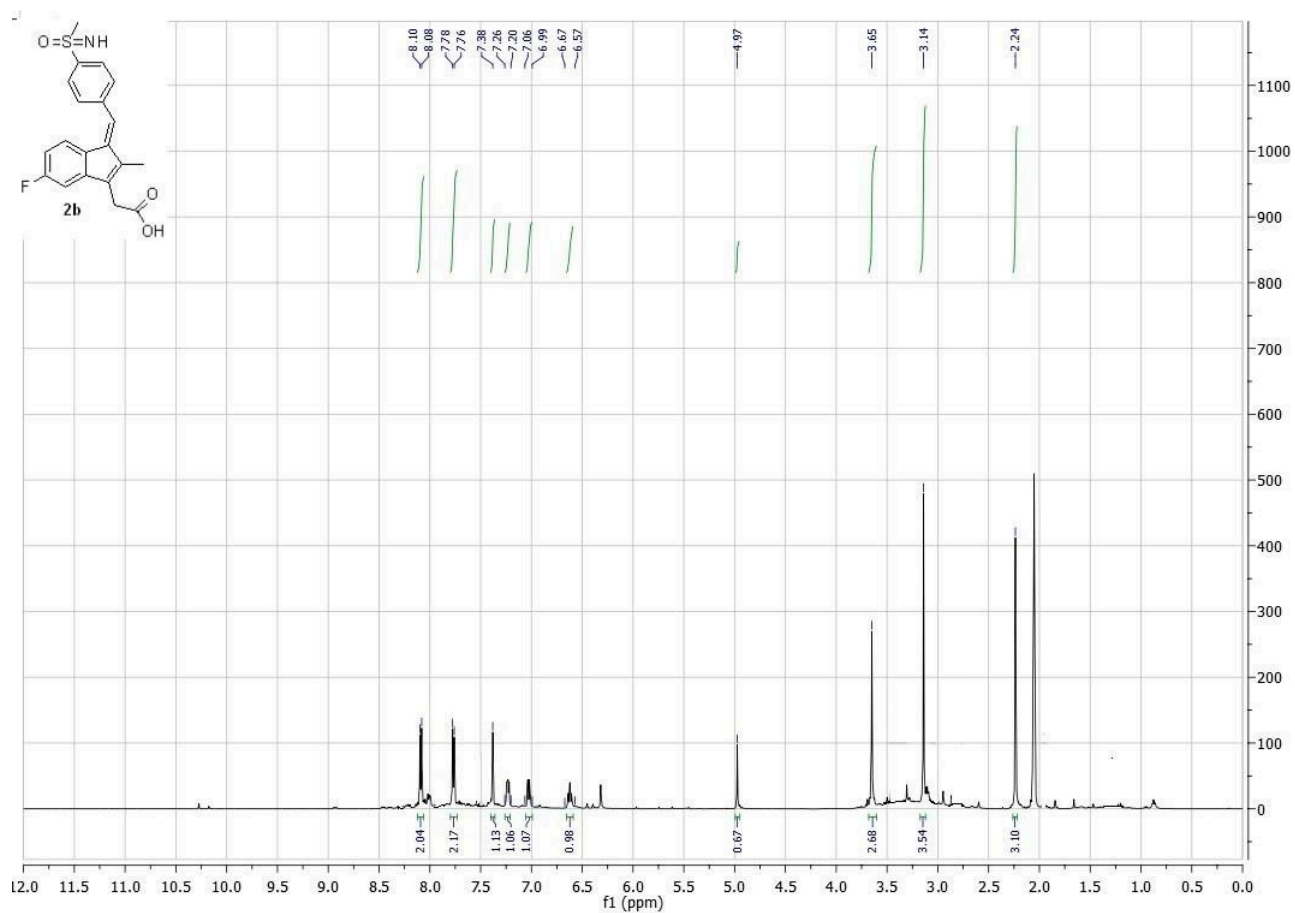

**Figure S4.** <sup>1</sup>H-NMR (500 MHz, Acetone-d<sub>6</sub>) spectrum of **(Z)-2-(5-fluoro-2-methyl-1-(4-(S-methylsulfonimidoyl)benzylidene)1H-inden-3-yl)acetic acid (2b)**.

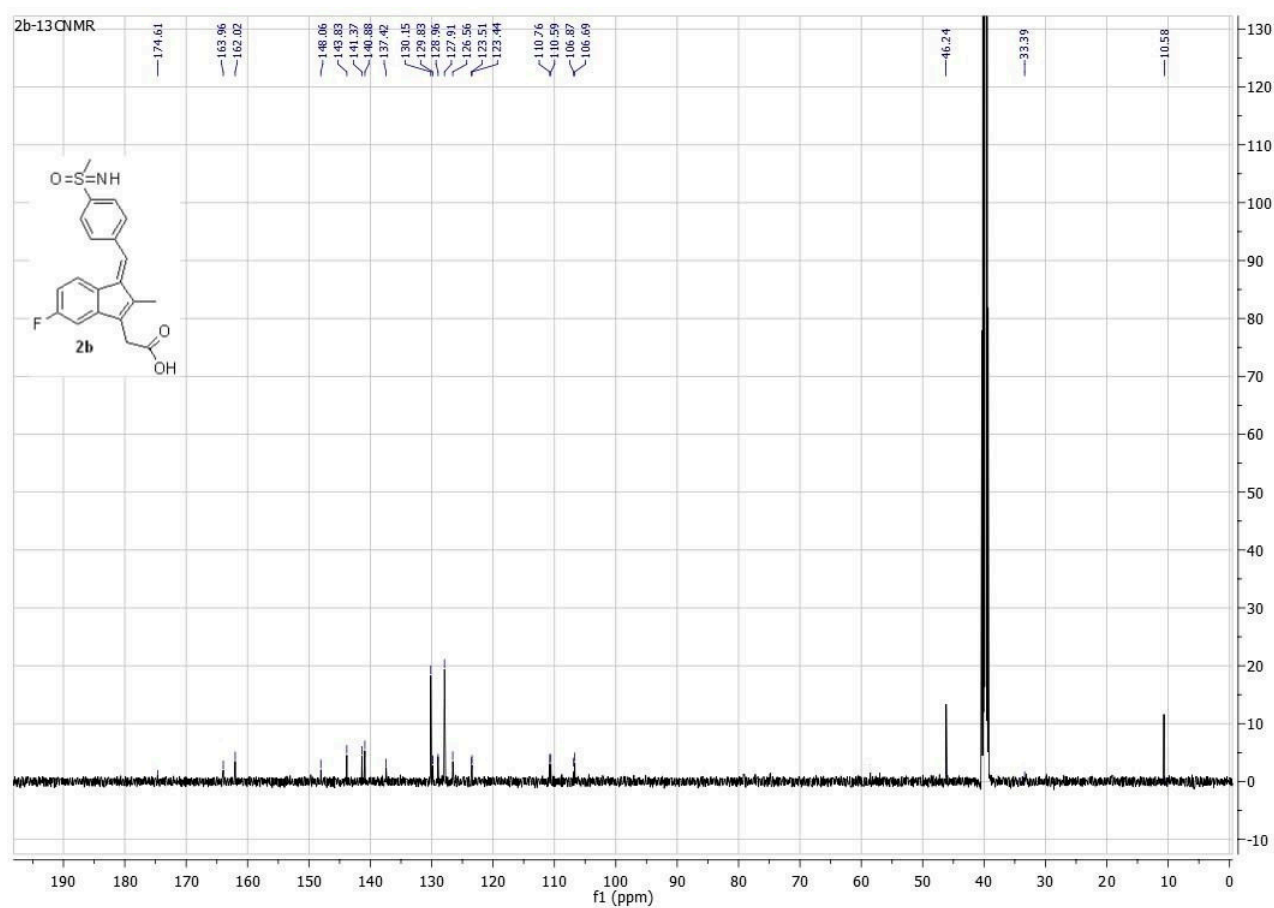

**Figure S5.**  $^{13}\text{C}$ -NMR (125 MHz,  $\text{DMSO-d}_6$ ) spectrum of (Z)-2-(5-fluoro-2-methyl-1-(4-(S-methylsulfonimidoyl)benzylidene)1H-inden-3-yl)acetic acid (**2b**).

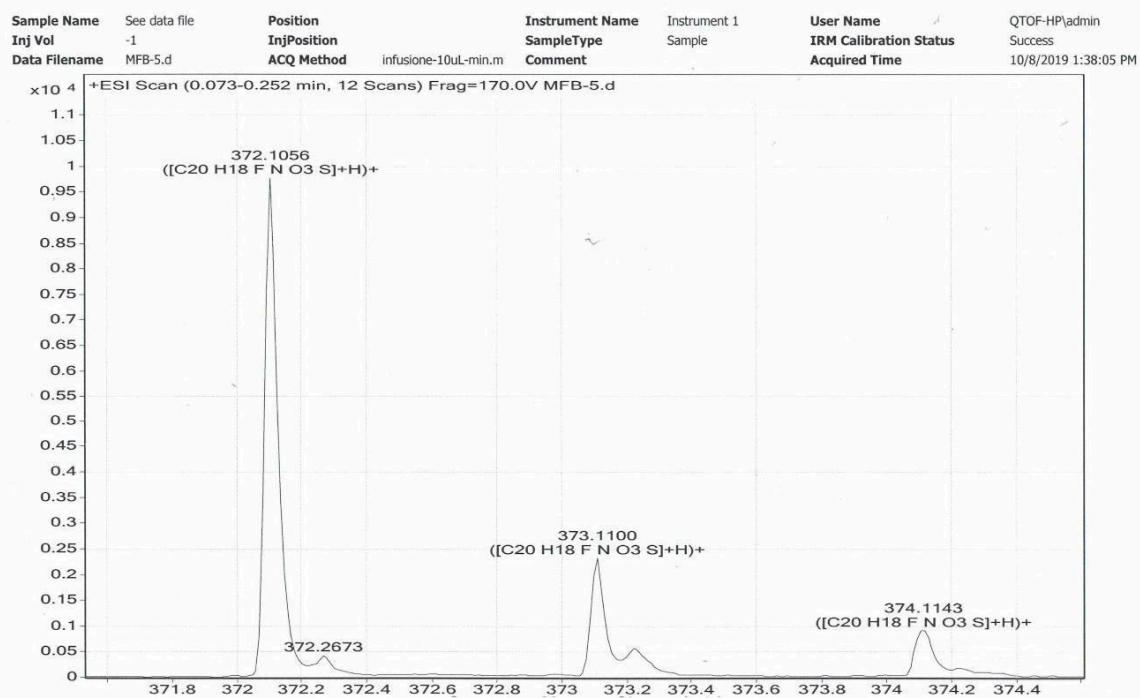

**Figure S6.** HRMS (ESI-TOF) spectrum of **(Z)-2-(5-fluoro-2-methyl-1-(4-(S-methylsulfonimidoyl)benzylidene)-1H-inden-3yl)acetic acid (2b)**.
